# Supplementary material for: Separation of rare-earth ions from ethylene glycol (+LiCl) solutions by non-aqueous solvent extraction with Cyanex 923
Source: Royal Society of Chemistry journal article supplement (doi:10.1039/c7ra09144c), 2017-01-01
Supplement: c7ra09144c1.pdf [file c7ra09144c1.pdf]

**Electronic Supporting Information**

**Separation of rare earth ions from ethylene glycol  
(+LiCl) solutions by non-aqueous solvent extraction  
with Cyanex 923**

Nagaphani Kumar Batchu,<sup>a</sup> Tom Vander Hoogerstraete,<sup>a</sup> Dipanjan Banerjee,<sup>b</sup>

and Koen Binnemans\*,<sup>a</sup>

Table S1. Viscosity of the rare-earth feed solution as a function of LiCl concentration (20 °C).

| Feed composition           | Viscosity (mPa·s) |
|----------------------------|-------------------|
| Ethylene glycol            | 17.5              |
| Ethylene glycol + 2 M LiCl | 53.0              |
| Ethylene glycol + 4 M LiCl | 211               |
| La(III)-50g/L+ 0 M LiCl    | 30                |
| Feed + 1 M LiCl            | 52                |
| Feed + 2 M LiCl            | 96                |
| Feed + 3 M LiCl            | 180               |
| Feed + 4 M LiCl            | 308               |

Feed: a mixture of 9 REEs, each of ~ 5 g/L in ethylene glycol

Table S2. Viscosity of the rare-earth feed solution as a function of temperature

| Temperature, °C | Viscosity (mPa·s) |
|-----------------|-------------------|
| 20              | 124               |
| 30              | 72                |
| 40              | 45                |
| 50              | 30                |
| 60              | 21                |

Feed: a Mixture of 9 REEs, each of ~5 g/L in ethylene glycol(+ 2 M LiCl)

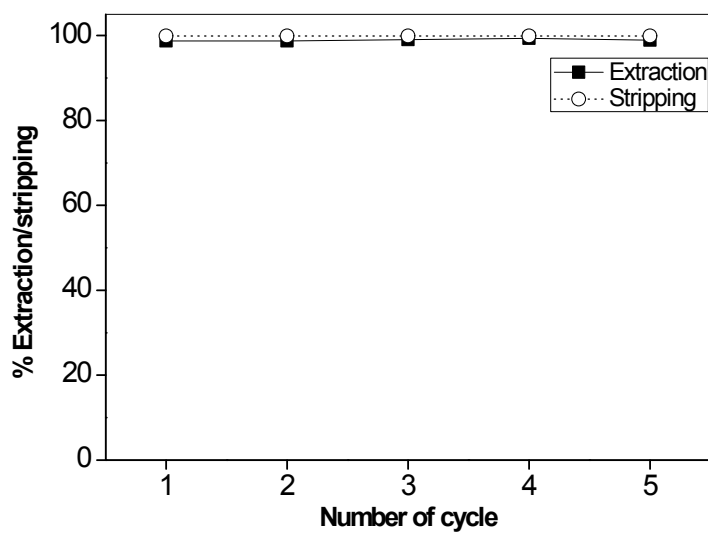

**Figure S1.** Recycling and reuse of 1 M Cyanex<sup>®</sup> 923 for the extraction and stripping of Yb(III) for five cycles.
